# Supplementary material
Source: Research Square preprint supplement (doi:10.21203/rs.3.rs-9719377/v1)
Supplement: Supplementary file 2 [file 487aa82a593d70240cd15500.pdf]

# Supplemental Figures

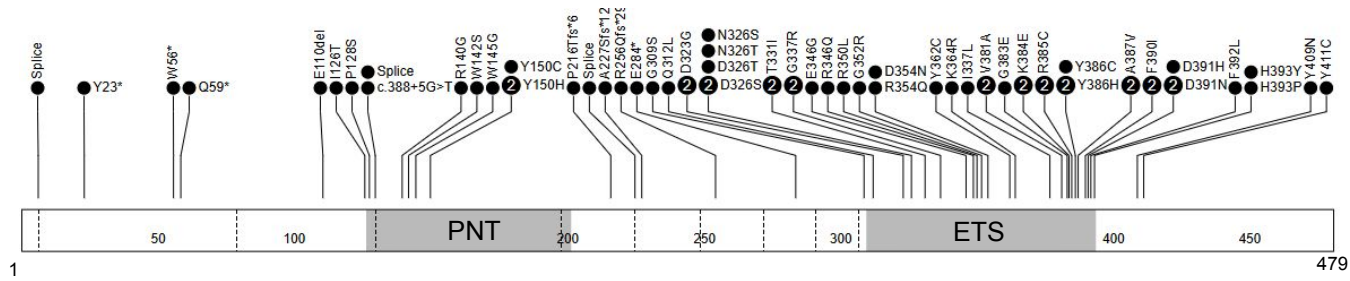

**Supplemental Figure 1. Identification of high confidence rare ERG variants from population databases.** Rare ERG variants from population databases (UK Biobank, All of Us, RGC) that passed a filtering strategy based on (i) variant type, (ii) ultra-rare allele frequency in population and (iii) *in silico* pathogenicity predictions using established algorithms (*i.e.* REVEL) and/or location (functional domain).

**A**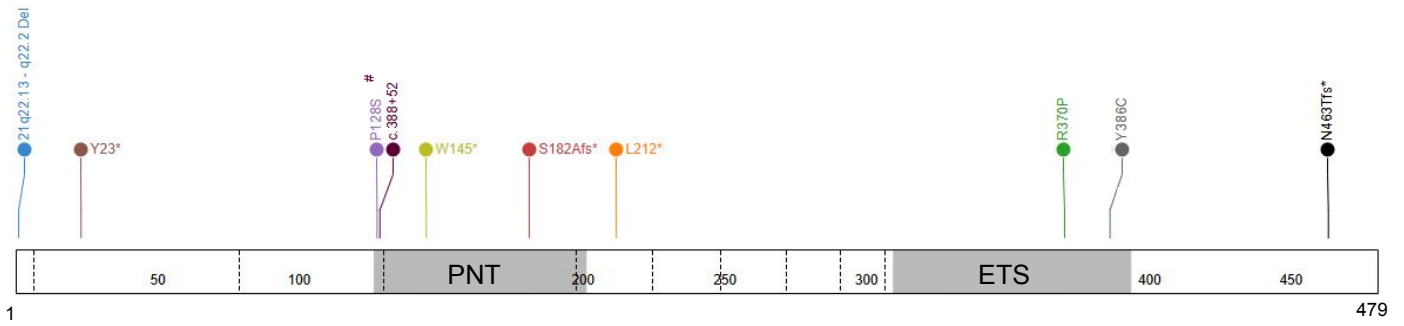

- Aortic and mitral valve atresias.
- Mitral and aortic valve disorders (**Thrombocytopenia, neutropenia**)
- Abdominal aortic **aneurysm** (**Thrombocytopenia**)
- Bicuspid aortic valve
- Aorta dilation (**aneurysm**)
- Aortic regurgitation (**Lymphedema**)
- Aortic **aneurysms** (**Thrombocytopenia**)
- Aortic valve insufficiency (**MDS**)
- Disorders of both mitral and tricuspid valves
- Aortic regurgitation, **ascending aorta aneurysm**

**B**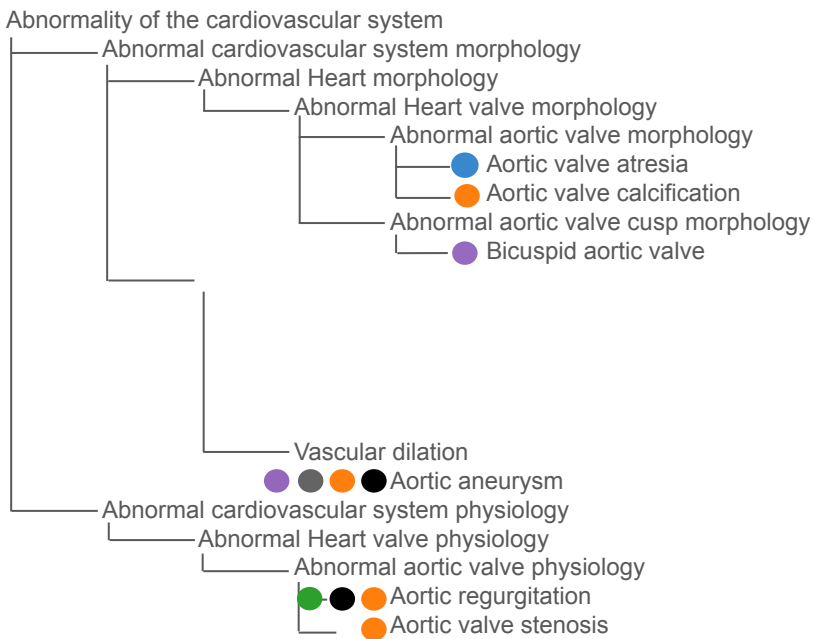

**Supplemental Figure 2. Phenotypic breakdown of rare germline *ERG* variants identified in patients with aortic/mitral valve morphology and/or physiology and/or aortic aneurysm.** **A)** Rare germline *ERG* variants from patients carrying aortic/mitral valve morphology and/or physiology and/or aortic aneurysm phenotypes are mapped onto the *ERG* protein (isoform, NP\_891548.1; transcript, NM\_182918.4). Previously reported *ERG* deficiency syndrome phenotypes (blood-related and lymphatic) included (brackets). ETS DNA binding domain (ETS); Pointed domain (PNT); exon junctions (black dotted lines). **B)** Patients with aortic valve dysfunction phenotypes mapped onto HPO term tree stemming from *abnormality of the cardiovascular system*. Variants (Y23\*, P128S) could not be mapped due to unavailable clinical diagnosis information.

## REVEL *in-silico* pathogenicity scores for ERG variants

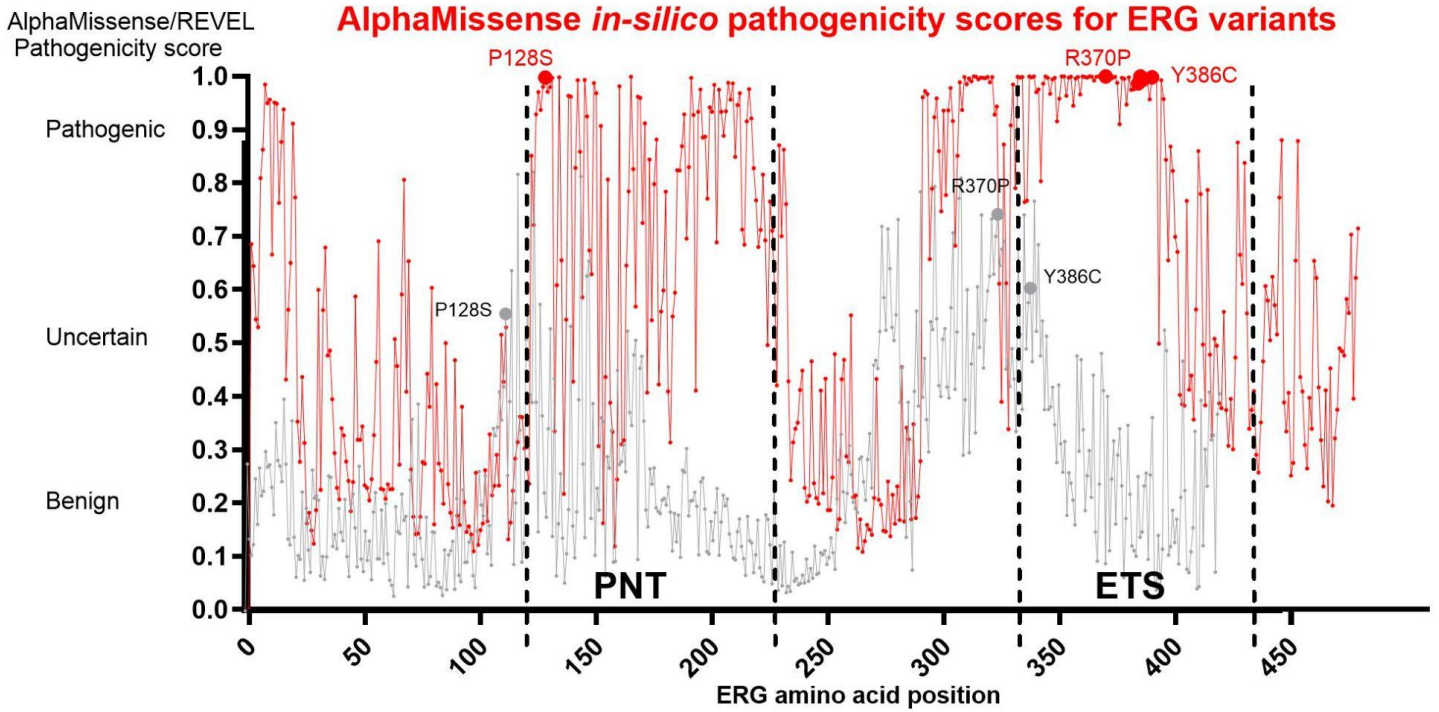

**Supplemental Figure 3. *In silico* pathogenicity predictor scores for ERG variants.** REVEL (grey) and AlphaMissense (red) scores of every possible variation at each amino acid position in NP\_891548.1 were averaged and plotted. Average REVEL and AlphaMissense scores indicate pathogenicity (0.6-1.0), variants of uncertain significance (0.3-0.6) and likely benign (0.0-0.3). ETS DNA binding domain (ETS) and Pointed domain (PNT) indicated by broken black lines. Missense variants from study indicated by larger dot.

■ Lymphedema  
■ BME and/or HM  
■ Cardiovascular  
■ Controls

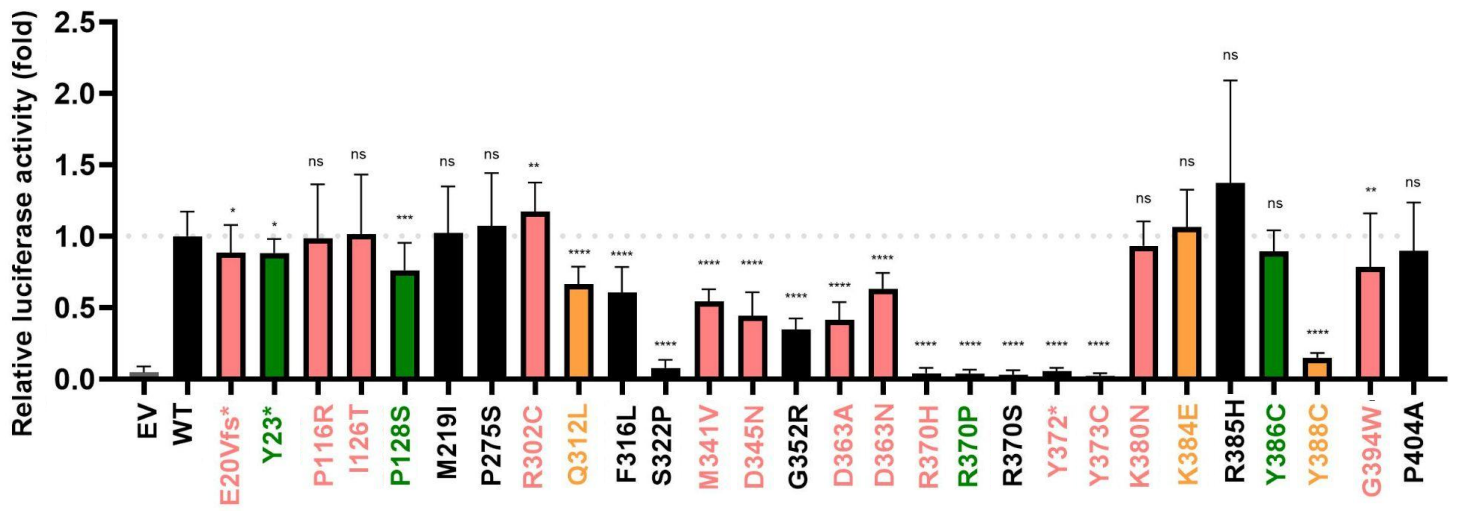

**Supplemental Figure 4. Functional validation of ERG variants.** K562 cells were transfected with pcDNA3 empty vector (EV) or pcDNA3-ERG (WT or variants) and co-transfected with a luciferase reporter plasmid driven by a ITGA2B promoter-Luc using lipofectamine 2000 and incubated for 20 hours before collection (quadruplicate replicates, repeated 3 times). Fold change (mean  $\pm$  SEM) compared to the ERG is plotted. Pairwise comparisons are shown (\*  $P < 0.05$ , \*\*  $P < 0.01$ , \*\*\*  $P < 0.001$ , \*\*\*\*  $P < 0.0001$  compared to ERG WT).

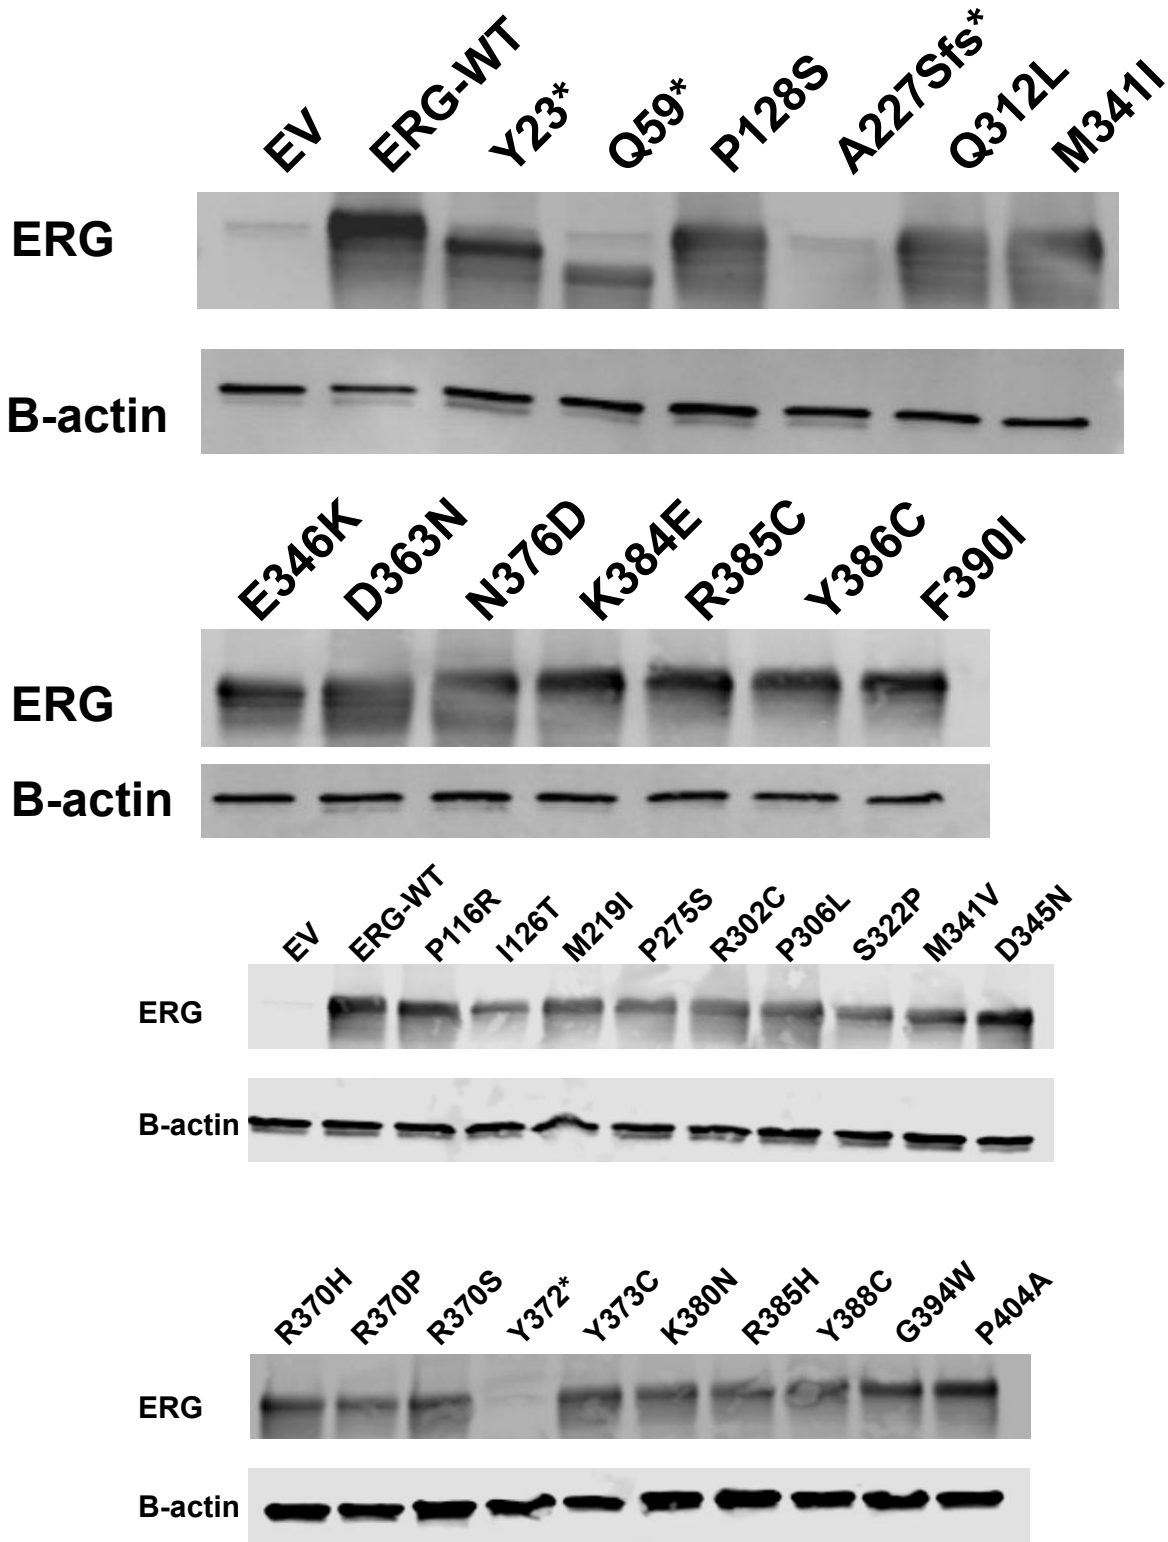

**Supplemental Figure 5. Western blot of ERG-mutant lysates.** Western blot of ERG-mutant lysates (previously published and novel variants). All ERG variants produced protein, except for A227Sfs\*12 and Y372\* (unstable). ERG early termination lysates demonstrates re-initiation and expression of smaller protein. Western blots were performed according to standard protocols probing with anti-ERG (ab92513, Abcam 1:1000) and a fluorescent secondary anti-rabbit antibody (LCR-925-68071, LI-COR 1:10,000) and anti-Bactin (3700S, CST 1:1000) and a fluorescent secondary anti-mouse antibody (LCR-925-32210, LICOR 1:10,000).

Y23\*

|       |             |             |             |                 |                 |                 |                 |                 |                 |                     |    |    |    |    |    |    |    |    |    |    |    |    |    |    |
|-------|-------------|-------------|-------------|-----------------|-----------------|-----------------|-----------------|-----------------|-----------------|---------------------|----|----|----|----|----|----|----|----|----|----|----|----|----|----|
| 1     | 2           | 3           | 4           | 5               | 6               | 7               | 8               | 9               | 10              | 11                  | 12 | 13 | 14 | 15 | 16 | 17 | 18 | 19 | 20 | 21 | 22 | 23 | 24 | 25 |
| A T G | G C C A G C | A C T A T T | A A G G A A | G C C T T A T C | A G T T G T G A | G T G A G T G A | G G A C C A G T | C G T T G T T T | G A G T G T G C | C T A C G G A A C G |    |    |    |    |    |    |    |    |    |    |    |    |    |    |
| M     | A           | S           | T           | I               | K               | E               | A               | L               | S               | V                   | V  | S  | E  | D  | Q  | S  | L  | F  | E  | C  | A  | Y  | G  | T  |

|                 |                     |                           |                               |                         |                                   |    |    |    |    |    |    |    |    |    |    |    |    |    |    |    |    |    |    |    |
|-----------------|---------------------|---------------------------|-------------------------------|-------------------------|-----------------------------------|----|----|----|----|----|----|----|----|----|----|----|----|----|----|----|----|----|----|----|
| 26              | 27                  | 28                        | 29                            | 30                      | 31                                | 32 | 33 | 34 | 35 | 36 | 37 | 38 | 39 | 40 | 41 | 42 | 43 | 44 | 45 | 46 | 47 | 48 | 49 | 50 |
| C C A C A C C T | G G C T A A G A C A | G A G A T G A C C G C G T | C C T C C T C C A G C G A C T | A T G G A C A G A C T T | C C A A G A T G A G C C C A C G C |    |    |    |    |    |    |    |    |    |    |    |    |    |    |    |    |    |    |    |
| P               | H                   | L                         | A                             | K                       | T                                 | E  | M  | T  | A  | S  | S  | S  | S  | D  | Y  | G  | Q  | T  | S  | K  | M  | S  | P  | R  |

Q59\*

|                                                                                                                                                     |    |    |    |    |    |    |    |    |    |    |    |    |    |    |    |    |    |    |    |    |    |    |    |    |  |
|-----------------------------------------------------------------------------------------------------------------------------------------------------|----|----|----|----|----|----|----|----|----|----|----|----|----|----|----|----|----|----|----|----|----|----|----|----|--|
| 51                                                                                                                                                  | 52 | 53 | 54 | 55 | 56 | 57 | 58 | 59 | 60 | 61 | 62 | 63 | 64 | 65 | 66 | 67 | 68 | 69 | 70 | 71 | 72 | 73 | 74 | 75 |  |
| G T C C C T C A G C A G G A T T G G C T G T C T C A A C C C C C A G C C A G G T C A C C A T C A A A A T G G A A T G T A A C C C T A G C C A G G T G |    |    |    |    |    |    |    |    |    |    |    |    |    |    |    |    |    |    |    |    |    |    |    |    |  |
| V                                                                                                                                                   | P  | Q  | Q  | D  | W  | L  | S  | Q  | P  | P  | A  | R  | V  | T  | I  | K  | M  | E  | C  | N  | P  | S  | Q  | V  |  |

**Supplemental Figure 6. ERG early terminations likely re-initiate translation.** Early termination variants have inframe translation initiation sites immediately downstream, red.

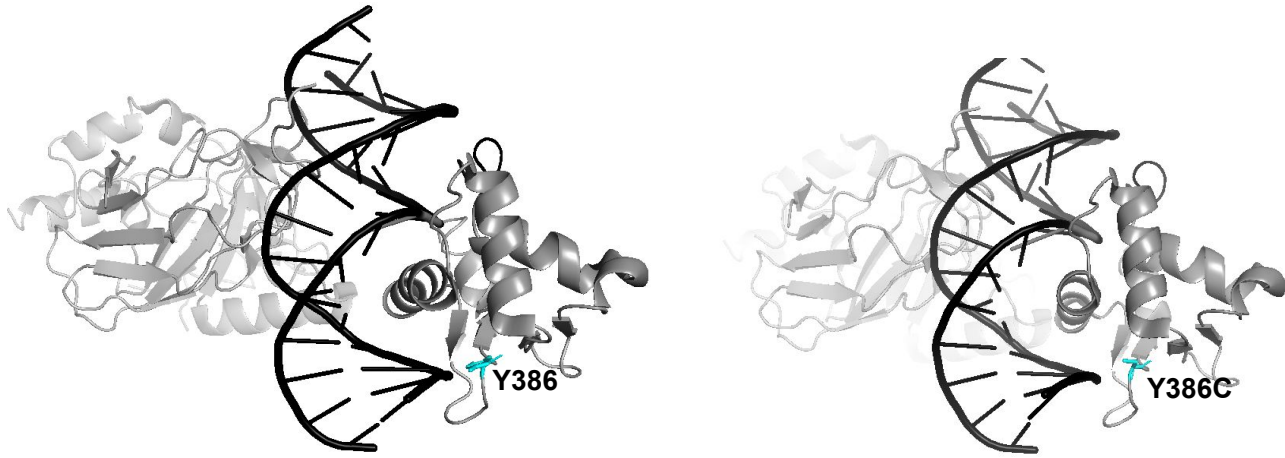

**Supplemental Figure 7. Predicted modelling of Y386 missense variant.** Predicted effect of ERG ETS domain variants on DNA binding - no predicted polar contacts (any hydrogen bonds) were identified. DNA (black double helix), indicated amino acid (cyan). 3D protein modelling performed on an ERG-DNA X-ray crystallography model (PDB ID: 6VGE A chain) obtained from UNIPROT online database. PyMOL was used to visualise the predicted structural impact of each variant.

**A**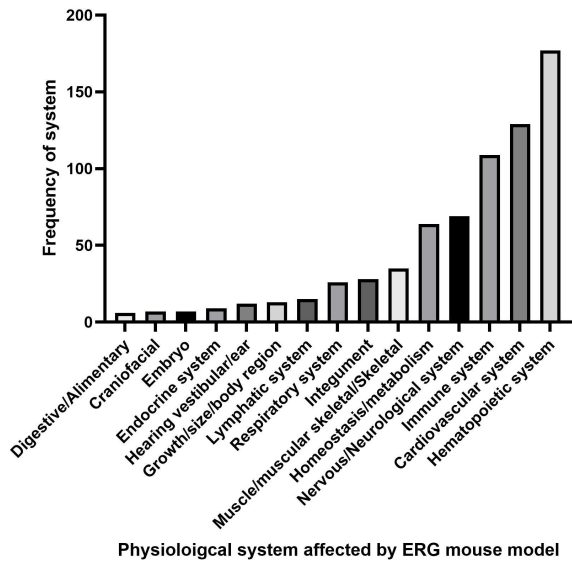**B**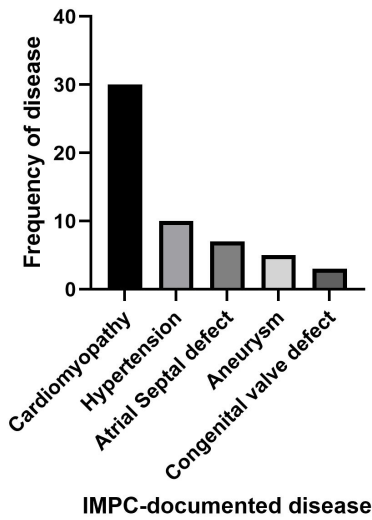

**Supplemental Figure 8. Assessing the phenotypic similarity between *Erg* mouse models and human diseases revealed the two most frequently affected systems were the hematopoietic and cardiovascular systems. A)** PhenoDigm scores were used to assess phenotypic similarity between human diseases and multiple *Erg* mouse models, including International Mouse Phenotyping Consortium (IMPC) and previously described targeted alleles ( $Erg^{em1(IMPC)Bay}$ ,  $Erg^{mld2}/Erg^+$ ,  $Erg^{tm1.1Path}/Erg^{tm1.1Path}$  and  $Erg^{tm2Poet}/Erg^{tm2Poet}$ ). Each IMPC documented disease was categorized into a physiological system, allowing for a system-wide analysis of *ERG*-linked phenotypes. The frequency of each physiological system was quantified, and only high-confidence associations (PhenoDigm scores >50) were included. Frequencies are shown for physiological systems observed more than five times. **B)** Top 5 most frequent IMPC diseases documented in the cardiovascular system.

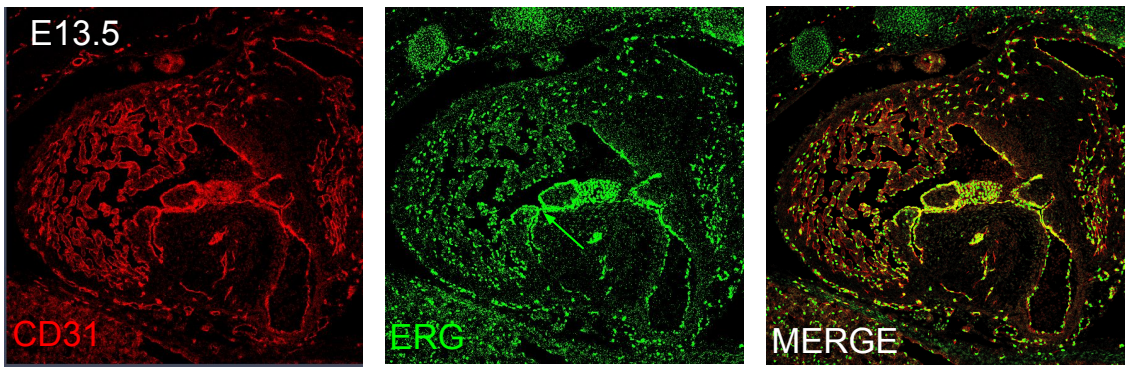

**Supplemental Figure 9. ERG expression in developing mitral valve.** Coronal sections through the mitral valve of E13.5 wild type mouse embryos, immunostained for CD31 and ERG. ERG is highly expressed in the mitral valve (indicated by green arrow).

### Supplemental Tables

**Supplemental Table 1: Summary of all new and reported ERG variants in patients/families with ERG deficiency syndrome (SGR of pathogenic ERG variant and/or aortic/mitral valve morphology and/or physiology and/or aortic aneurysm, HM/BMF and/or lymphedema phenotypes).** Variant Allele frequency (VAF); Aortic aneurysm (AA); Aortic valve dysfunction (AV); Mitral valve dysfunction (MV); tricuspid valve dysfunction (TV); Thrombocytopenia (Thr); Neutropenia (Neu); Pancytopenia (Pan); Inherited bleeding disorder (IBD); Myelodysplastic syndrome (MDS); Acute Myeloid Leukemia (AML); Acute lymphoblastic leukemia (ALL); Chronic lymphocytic leukemia (CLL); American College of Medical Genetics and Genomics (ACMG); Pathogenic (P); Likely Pathogenic (LP); Variant of Uncertain Significance (VUS); Variant of Uncertain Significance favoring pathogenicity (VUS-A). Families highlighted within black box.

| Source/Reference                             | Family     | Individual | p.HGVS<br>(NM_182918.4)<br>(NP_891548.1)                 | Germline<br>ERG<br>(inherited/ <i>de novo</i> )<br>*VAF = 40-60% | Sex | Age of diagnosis (yr) | Aortic Aneurysm | Valve dysfunction | Other Cardiovascular dysfunction | Bone Marrow Failure | Hematological malignancy | Lymphatic phenotype | Somatic Gene Rescue | ACMG classification | ACMG criteria<br>(Modified - see Supplemental Table) |
|----------------------------------------------|------------|------------|----------------------------------------------------------|------------------------------------------------------------------|-----|-----------------------|-----------------|-------------------|----------------------------------|---------------------|--------------------------|---------------------|---------------------|---------------------|------------------------------------------------------|
| International collaboration<br>(GeneMatcher) | Family     | I.I        | Whole gene deletion<br>(+2 other genes<br>KCNJ15, KCNJ6) | Unknown                                                          | M   |                       |                 |                   |                                  |                     |                          |                     |                     | LP                  | PVS1, PM2                                            |
|                                              |            | II.I       |                                                          | Yes (inherited)                                                  | M   | <18                   | AV MV TV        |                   |                                  |                     |                          |                     |                     |                     |                                                      |
| Previously reported<br>(Zerella et al. 2024) | Individual | I.I        | p.E20Vfs*13                                              | Yes (inherited)                                                  | M   | 38                    |                 |                   |                                  |                     | MDS AML                  |                     |                     | VUS-A               | PVS1_Moderate, PM2                                   |
| Population database<br>(UK Biobank)          | Individual | I.I        | p.Y23*                                                   | Yes*                                                             | M   |                       |                 | MV AV             |                                  | Thr Neu             |                          |                     |                     | VUS-A               | PVS1_Moderate, PM2                                   |
| Previously reported<br>(Zerella et al. 2024) | Individual | I.I        | p.P116R                                                  |                                                                  | F   | 73                    |                 |                   |                                  | Thr                 |                          |                     |                     | VUS                 | BS3_Supporting                                       |
| Previously reported<br>(Zerella et al. 2024) | Individual | I.I        | p.I126T                                                  | Yes<br>(unknown)                                                 |     | <14                   |                 |                   |                                  | Thr                 | AML                      |                     |                     | VUS                 | BS3_Supporting, PM2_Supporting                       |
| Previously reported<br>(Zerella et al. 2024) | Individual | I.I        | p.V127Efs*82                                             | Yes<br>(unknown)                                                 |     | <18                   |                 |                   |                                  |                     | ALL                      |                     |                     | VUS-A               | PVS1, PM2                                            |
| Population database<br>(UK Biobank)          | Individual | I.I        | p.P128S                                                  | Yes*                                                             | M   |                       | AA              |                   |                                  | Thr                 |                          |                     |                     | LP                  | PS3, PP3_Supporting, PM2_Supporting                  |
| National collaboration                       | Individual | I.I        | c.388+52C>G                                              | Unknown                                                          | M   |                       |                 | AV                |                                  |                     |                          |                     |                     | VUS-A               | PVS1, PM2                                            |
| International collaboration<br>(GeneMatcher) | Individual | I.I        | p.W145*                                                  | Yes ( <i>de novo</i> )                                           |     | 0                     | AA              |                   |                                  |                     |                          |                     |                     | P                   | PVS1, PS2, PM2                                       |
| Previously reported<br>(Greene et al. 2023)  | Family     | I.I        | p.S182Afs*22                                             | Unknown                                                          | F   |                       |                 |                   |                                  |                     |                          |                     |                     | P                   | PVS1, PM2, PM3                                       |
|                                              |            | II.I       | p.S182Afs*22                                             | Yes (inherited)                                                  | M   |                       | AV              |                   |                                  |                     |                          |                     |                     |                     |                                                      |
| Previously reported<br>(Erhart et al. 2025)  | Family     | I.I        | p.L212*                                                  | Unknown                                                          | M   | 49                    | AA              | AV MV             |                                  | Thr                 |                          |                     |                     | LP                  | PVS1, PM2                                            |
|                                              |            | I.II       | p.L212*                                                  | Yes (inherited)                                                  | M   | 18                    |                 |                   |                                  |                     |                          |                     |                     |                     |                                                      |
| Previously reported<br>(Greene et al. 2023)  | Individual | I.I        | p.T224Rfs*15                                             | Yes ( <i>de novo</i> )                                           | M   | <1                    |                 |                   |                                  |                     |                          |                     |                     | P                   | PVS1, PS2, PM2                                       |
| Previously reported<br>(Zerella et al. 2024) | Individual | I.I        | p.R302C                                                  | Yes<br>(unknown)                                                 | M   |                       |                 |                   |                                  |                     | CLL                      |                     |                     | VUS                 | PS3_Supporting, PP3                                  |
| Population database<br>(UK Biobank)          | Individual | I.I        | p.Q312L                                                  | Yes*                                                             |     |                       |                 |                   |                                  |                     |                          |                     |                     | LP                  | PS3, PP3_Moderate, PM2_Supporting                    |
| Population database<br>(UK Biobank)          | Individual | I.I        | p.F316L                                                  | Unknown                                                          | F   |                       |                 |                   |                                  |                     |                          |                     |                     | LP                  | PS3, PP3, PM2_Supporting, PM3                        |
| Previously reported<br>(Zerella et al. 2024) | Family     | I.I        | p.M341V                                                  | Unknown                                                          | M   |                       |                 |                   |                                  |                     |                          |                     |                     | LP                  | PS3, PM5, PM2_Supporting                             |
|                                              |            | I.II       | p.M341V                                                  | Yes (inherited)                                                  | F   | 0                     |                 |                   | BMF                              |                     |                          |                     |                     |                     |                                                      |
| Previously reported<br>(Zerella et al. 2024) | Individual | I.I        | p.M341V                                                  | Unknown                                                          | F   | 56                    |                 |                   |                                  | BMF                 | MDS                      |                     |                     | LP                  | PS3, PM5, PM2_Supporting                             |

|                                           |            |        |              |                 |   |     |    |       |       |         |  |  |         |  |       |                                                                   |
|-------------------------------------------|------------|--------|--------------|-----------------|---|-----|----|-------|-------|---------|--|--|---------|--|-------|-------------------------------------------------------------------|
| Previously reported (Zerella et al. 2024) | Individual | I.I    | p.D345N      | Likely Somatic  |   |     |    |       |       |         |  |  | MDS     |  | LP    | PS3, PP3_Supporting, PM1, PM2_Supporting                          |
| Population database (UK Biobank)          | Individual | I.I    | p.G352R      | Unknown         | F |     |    |       |       |         |  |  |         |  | LP    | PS3, PP3_Strong, PM2_Supporting, PM3                              |
| Previously reported (Zerella et al. 2024) | Individual | I.I    | p.D363A      | Likely Somatic  |   |     |    |       |       |         |  |  | MDS     |  | LP    | PS3, PM2_Supporting, PM1_Supporting, PM5                          |
| International collaboration               | Individual | I.I    | p.D363N      | Yes*            |   |     |    |       |       |         |  |  | MDS     |  | P     | PS3, PM3, PP3_Supporting, PM1_Supporting, PM2_Supporting, PM5     |
| Previously reported (Zerella et al. 2024) | Family     | II.I   | p.R370H      | Yes (inherited) | M | 0   |    |       |       | Neu Pan |  |  | AML     |  | P     | PS3, PM1, PM2-Supporting, PM3, PM5, PP3                           |
|                                           |            | II.II  | p.R370H      | Yes (inherited) | F | NA  |    |       |       |         |  |  |         |  |       |                                                                   |
|                                           |            | II.III | Unknown      |                 |   |     |    |       |       |         |  |  |         |  |       |                                                                   |
| Previously reported (Zerella et al. 2024) | Individual | I.I    | p.R370P      | Yes (inherited) | M | 29  |    | AV    |       | Thr Leu |  |  | MDS     |  | P     | PS3, PM1, PM2-Supporting, PM5, PP3                                |
| Previously reported (Zerella et al. 2024) | Individual | I.I    | p.Y372*      | Yes (de novo)   | M | 0   |    |       |       | BMF Pan |  |  |         |  | P     | PVS1, PS2, PM2                                                    |
| Previously reported (Zerella et al. 2024) | Family     | I.I    | p.Y373C      | Unknown         | F | 27  |    |       |       | Thr Neu |  |  | MDS AML |  | P     | PS3, PM1, PM2_Supporting, PM3, PP1, PP3_Strong                    |
|                                           |            | II.I   | p.Y373C      | Yes (Inherited) | M | 19  |    |       |       | Thr Neu |  |  |         |  |       |                                                                   |
|                                           |            | II.II  | p.Y373C      | Yes (Inherited) | M | 21  |    |       |       | Thr Neu |  |  |         |  |       |                                                                   |
| Previously reported (Zerella et al. 2024) | Individual | I.I    | p.K380N      | Yes (de novo)   |   | >18 |    |       |       | Pan Thr |  |  |         |  | LP    | PS2, PS3_Supporting, PM1_Supporting, PM2_Supporting, PP3_moderate |
| Population database (UK Biobank)          | Individual | I.I    | p.K384E      | Yes*            | M |     |    |       |       | Thr     |  |  |         |  | VUS-A | PS3_Supporting, PM1_Supporting, PM2_Supporting, PP3_Moderate      |
| Population database (All of us)           | Individual | I.I    | p.Y386C      | Yes*            |   |     |    | MV TV |       |         |  |  |         |  | LP    | PS3_Moderate, PM1_Supporting, PM2_Supporting, PP3_Moderate        |
| Previously reported (Zerella et al. 2024) | Family     | I.I    | p.Y388C      | Unknown         | F | 8   |    |       |       |         |  |  |         |  | P     | PS3, PM1_Supporting, PM2_Supporting, PM3, PP3_Strong              |
|                                           |            | II.I   | p.Y388C      | Yes (inherited) | F | ~50 |    |       |       |         |  |  |         |  |       |                                                                   |
| Previously reported (Zerella et al. 2024) | Individual | I.I    | p.G394W      | Yes (unknown)   |   |     |    |       |       |         |  |  | AML     |  | VUS   | PS3_Supporting, PM2_Supporting, PP3_Moderate                      |
| International collaboration               | Individual | I.I    | p.F446Lfs*59 | Yes (de novo)   | M | 9   |    |       |       | IBD     |  |  |         |  | LP    | PVS1_Moderate, PM2, PS2                                           |
| Previously reported (Greene et al. 2023)  | Family     | I.I    | p.N463Tfs*42 | Unknown         | M |     |    |       |       |         |  |  |         |  | VUS-A | PS3, PM2                                                          |
|                                           |            | II.I   | p.N463Tfs*42 | Yes (inherited) | F |     |    |       | AV    |         |  |  |         |  |       |                                                                   |
|                                           |            | II.II  | p.N463Tfs*42 | Yes (inherited) | M | ~13 | AA |       | AV TV |         |  |  |         |  |       |                                                                   |

| Supplemental Table 2: High confidence rare ERG variants are hidden in population/phenotype databases. ERG variants from allele frequency browsers of All of Us, Regeneron Genetics center, UK Biobank, Gwas2MP and Decipher were pulled down and filtered using (i) Variant type, (ii) ultra-rare allele frequency in population and (iii) in silico pathogenicity predictions using established algorithms (i.e., REVEL, >0.9) and location (functional domain). Variants that passed these criteria below. Variants that progressed to functional validation are highlighted with black boxes. Not applicable, NA. |                           |                               |                               |                                                                             |                                 |                            |             |                                   |                                            |                                            |
|----------------------------------------------------------------------------------------------------------------------------------------------------------------------------------------------------------------------------------------------------------------------------------------------------------------------------------------------------------------------------------------------------------------------------------------------------------------------------------------------------------------------------------------------------------------------------------------------------------------------|---------------------------|-------------------------------|-------------------------------|-----------------------------------------------------------------------------|---------------------------------|----------------------------|-------------|-----------------------------------|--------------------------------------------|--------------------------------------------|
| Database                                                                                                                                                                                                                                                                                                                                                                                                                                                                                                                                                                                                             | gHGVs (RCR,35438) (13623) | ERG gHGVs (RCR,35438) (13623) | ERG gHGVs (RCR,35438) (13623) | Variant Type                                                                | Alpha frequency (gen AD + 4.8k) | Situated in PNT/ETS domain | REVEL score | GENIE                             | Mitochondrial tolerance to variation score | ERG deficiency syndrome phenotype          |
| Decipher                                                                                                                                                                                                                                                                                                                                                                                                                                                                                                                                                                                                             | 21:3844620-4047767 Del    | NA                            | NA                            | Partial deletion (deletion promoter of some ERG transcripts and last exons) | NA                              | NA                         | NA          | NA                                | NA                                         | None reported                              |
| All of Us                                                                                                                                                                                                                                                                                                                                                                                                                                                                                                                                                                                                            | 21:3844642 AC>A           | c-48>1del                     | NA                            | Splice donor                                                                | 0                               | NA                         | NA          | Uncertain                         | NA                                         | None reported                              |
| All of Us                                                                                                                                                                                                                                                                                                                                                                                                                                                                                                                                                                                                            | 21:3845697 T>CATG         | p.R121H(EV21) (E101231)       | NA                            | Frameshift                                                                  | 0                               | NA                         | NA          | NA                                | NA                                         | None reported                              |
| All of Us                                                                                                                                                                                                                                                                                                                                                                                                                                                                                                                                                                                                            | 21:3845766 C>T            | c.39>1G>A                     | NA                            | Splice donor                                                                | 0                               | NA                         | NA          | Uncertain                         | NA                                         | None reported                              |
| All of Us                                                                                                                                                                                                                                                                                                                                                                                                                                                                                                                                                                                                            | 21:3846122 C>T            | c.19>1G>A                     | NA                            | Splice acceptor                                                             | 0                               | NA                         | NA          | Splice altering (95% probability) | NA                                         | None reported                              |
| UK Biobank                                                                                                                                                                                                                                                                                                                                                                                                                                                                                                                                                                                                           | 21:3844571 G>T            | P.Y121T (Y21*)                | Termination                   | 1                                                                           | NA                              | NA                         | NA          | NA                                | NA                                         | Disorders of both mitral and aortic valves |
| All of Us                                                                                                                                                                                                                                                                                                                                                                                                                                                                                                                                                                                                            | 21:3844573 C>T            | P.T195T (W5*)                 | Termination                   | 0                                                                           | NA                              | NA                         | NA          | NA                                | NA                                         | None reported                              |
| UK Biobank                                                                                                                                                                                                                                                                                                                                                                                                                                                                                                                                                                                                           | 21:3844465 G>A            | P.G497E (G59*)                | Termination                   | 1                                                                           | NA                              | NA                         | NA          | NA                                | NA                                         | None reported                              |
| RCG Million Exome Variant Browser                                                                                                                                                                                                                                                                                                                                                                                                                                                                                                                                                                                    | 21:3842305 C>A            | c.388>5G>T                    | Splice                        | 1                                                                           | NA                              | NA                         | NA          | Splice altering (75% probability) | NA                                         | Unknown                                    |
| All of Us                                                                                                                                                                                                                                                                                                                                                                                                                                                                                                                                                                                                            | 21:3842347 TCT>T          | P.G110del (E110del)           | In frame deletion             | 2                                                                           | PNT                             | NA                         | NA          | NA                                | NA                                         | None reported                              |
| UK Biobank                                                                                                                                                                                                                                                                                                                                                                                                                                                                                                                                                                                                           | 21:3842416 G>A            | P.W125E (F125E)               | Missense                      | 2                                                                           | PNT                             | 0.598                      | NA          | 0.35 (mildly intolerant)          | Yes                                        | Disorders of both mitral and aortic valves |
| RCG Million Exome Variant Browser                                                                                                                                                                                                                                                                                                                                                                                                                                                                                                                                                                                    | 21:3840367 C>G            | P.T122C (F122C)               | Missense                      | 0                                                                           | PNT                             | 0.936                      | NA          | 0.53 (slightly intolerant)        | Unknown                                    | Disorders of both mitral and aortic valves |
| RCG Million Exome Variant Browser                                                                                                                                                                                                                                                                                                                                                                                                                                                                                                                                                                                    | 21:3840365 A>G            | P.W145I (W145I)               | Missense                      | 0                                                                           | PNT                             | 0.656                      | NA          | 0.65 (slightly intolerant)        | Unknown                                    | Disorders of both mitral and aortic valves |
| All of Us                                                                                                                                                                                                                                                                                                                                                                                                                                                                                                                                                                                                            | 21:3840369 T>C            | P.V158V (V158C)               | Missense                      | 0                                                                           | PNT                             | 0.653                      | NA          | 0.97 (slightly intolerant)        | None reported                              | Disorders of both mitral and aortic valves |
| All of Us                                                                                                                                                                                                                                                                                                                                                                                                                                                                                                                                                                                                            | 21:3840365 A>G            | P.V158H (V158H)               | Missense                      | 1                                                                           | PNT                             | 0.587                      | NA          | 0.97 (slightly intolerant)        | None reported                              | Disorders of both mitral and aortic valves |
| RCG Million Exome Variant Browser                                                                                                                                                                                                                                                                                                                                                                                                                                                                                                                                                                                    | 21:3840365 A>G            | P.V158H (V158H)               | Missense                      | 1                                                                           | PNT                             | 0.587                      | NA          | 0.97 (slightly intolerant)        | Unknown                                    | Disorders of both mitral and aortic valves |
| All of Us                                                                                                                                                                                                                                                                                                                                                                                                                                                                                                                                                                                                            | 21:3840370 C>T            | c.389>1G>T                    | Splice acceptor               | 0                                                                           | NA                              | NA                         | NA          | Splice altering (99% probability) | NA                                         | None reported                              |
| All of Us                                                                                                                                                                                                                                                                                                                                                                                                                                                                                                                                                                                                            | 21:3840383 GGA>G          | P.Proc101del (P216T*)         | Frameshift                    | 1                                                                           | NA                              | NA                         | NA          | NA                                | NA                                         | None reported                              |
| UK Biobank                                                                                                                                                                                                                                                                                                                                                                                                                                                                                                                                                                                                           | 21:3840063 TGG>T          | P.A1227del (A1227del)         | Frameshift                    | 1                                                                           | NA                              | NA                         | NA          | NA                                | NA                                         | None reported                              |
| All of Us                                                                                                                                                                                                                                                                                                                                                                                                                                                                                                                                                                                                            | 21:3839248 G>GT           | P.A6227del (A6227del)         | Frameshift                    | 2                                                                           | NA                              | NA                         | NA          | NA                                | NA                                         | None reported                              |
| All of Us                                                                                                                                                                                                                                                                                                                                                                                                                                                                                                                                                                                                            | 21:3839277 T>C            | c.813>A>G                     | Splice                        | 0                                                                           | NA                              | NA                         | NA          | Splice altering (75% probability) | NA                                         | None reported                              |
| All of Us                                                                                                                                                                                                                                                                                                                                                                                                                                                                                                                                                                                                            | 21:3839480 C>A            | P.G284T (G284*)               | Termination                   | 0                                                                           | NA                              | NA                         | NA          | NA                                | NA                                         | None reported                              |
| UK Biobank                                                                                                                                                                                                                                                                                                                                                                                                                                                                                                                                                                                                           | 21:3839390 T>A            | P.G121L (G121L)               | Missense                      | 1                                                                           | ETS                             | 0.73                       | NA          | 0.28 (intolerant)                 | Yes                                        | Disorders of both mitral and aortic valves |
| RCG Million Exome Variant Browser                                                                                                                                                                                                                                                                                                                                                                                                                                                                                                                                                                                    | 21:3838375 T>C            | P.A1229I (D129I)              | Missense                      | 1                                                                           | ETS                             | 0.676                      | NA          | 0.06 (highly intolerant)          | Unknown                                    | Disorders of both mitral and aortic valves |
| UK Biobank                                                                                                                                                                                                                                                                                                                                                                                                                                                                                                                                                                                                           | 21:3838375 T>C            | P.A1229I (D129I)              | Missense                      | 1                                                                           | ETS                             | 0.676                      | NA          | 0.06 (highly intolerant)          | Unknown                                    | Disorders of both mitral and aortic valves |
| UK Biobank                                                                                                                                                                                                                                                                                                                                                                                                                                                                                                                                                                                                           | 21:3838384 C>G            | P.G137A (G137A)               | Missense                      | 1                                                                           | ETS                             | 0.66                       | NA          | 0.25 (intolerant)                 | Essential (primary) hypertension           | Disorders of both mitral and aortic valves |
| RCG Million Exome Variant Browser                                                                                                                                                                                                                                                                                                                                                                                                                                                                                                                                                                                    | 21:3838384 C>T            | P.G137A (G137A)               | Missense                      | 1                                                                           | ETS                             | 0.66                       | NA          | 0.25 (intolerant)                 | Unknown                                    | Disorders of both mitral and aortic valves |
| All of Us                                                                                                                                                                                                                                                                                                                                                                                                                                                                                                                                                                                                            | 21:3838386 T>C            | P.G136G (G136G)               | Missense                      | 0                                                                           | ETS                             | 0.59                       | NA          | 0.5 (intolerant)                  | None reported                              | Disorders of both mitral and aortic valves |
| All of Us                                                                                                                                                                                                                                                                                                                                                                                                                                                                                                                                                                                                            | 21:3838378 T>C            | P.T162C (V162C)               | Missense                      | 0                                                                           | ETS                             | 0.854                      | NA          | 0.22 (intolerant)                 | None reported                              | Disorders of both mitral and aortic valves |
| RCG Million Exome Variant Browser                                                                                                                                                                                                                                                                                                                                                                                                                                                                                                                                                                                    | 21:3838370 A>G            | P.V181A (V181A)               | Missense                      | 2                                                                           | ETS                             | 0.683                      | NA          | 0.13 (highly intolerant)          | Unknown                                    | Disorders of both mitral and aortic valves |
| UK Biobank                                                                                                                                                                                                                                                                                                                                                                                                                                                                                                                                                                                                           | 21:3838370 A>G            | P.V181A (V181A)               | Missense                      | 2                                                                           | ETS                             | 0.683                      | NA          | 0.13 (highly intolerant)          | None reported                              | Disorders of both mitral and aortic valves |
| RCG Million Exome Variant Browser                                                                                                                                                                                                                                                                                                                                                                                                                                                                                                                                                                                    | 21:3838393 C>T            | P.G138I (G138I)               | Missense                      | 0                                                                           | ETS                             | 0.862                      | NA          | 0.12 (highly intolerant)          | Unknown                                    | Disorders of both mitral and aortic valves |
| UK Biobank                                                                                                                                                                                                                                                                                                                                                                                                                                                                                                                                                                                                           | 21:3838393 T>C            | P.Ly386G (K386E)              | Missense                      | 2                                                                           | ETS                             | 0.687                      | NA          | 0.11 (highly intolerant)          | Yes                                        | Disorders of both mitral and aortic valves |
| RCG Million Exome Variant Browser                                                                                                                                                                                                                                                                                                                                                                                                                                                                                                                                                                                    | 21:3838393 T>C            | P.Ly386G (K386E)              | Missense                      | 2                                                                           | ETS                             | 0.687                      | NA          | 0.11 (highly intolerant)          | Unknown                                    | Disorders of both mitral and aortic valves |
| UK Biobank                                                                                                                                                                                                                                                                                                                                                                                                                                                                                                                                                                                                           | 21:3838369 G>A            | P.A193C (R193C)               | Missense                      | 2                                                                           | ETS                             | 0.619                      | NA          | 0.15 (highly intolerant)          | No                                         | Disorders of both mitral and aortic valves |
| RCG Million Exome Variant Browser                                                                                                                                                                                                                                                                                                                                                                                                                                                                                                                                                                                    | 21:3838369 G>A            | P.A193C (R193C)               | Missense                      | 2                                                                           | ETS                             | 0.619                      | NA          | 0.15 (highly intolerant)          | Unknown                                    | Disorders of both mitral and aortic valves |
| All of Us                                                                                                                                                                                                                                                                                                                                                                                                                                                                                                                                                                                                            | 21:3838366 T>C            | P.V136C (V136C)               | Missense                      | 0                                                                           | ETS                             | 0.735                      | NA          | 0.19 (intolerant)                 | Yes                                        | Disorders of both mitral and aortic valves |
| UK Biobank                                                                                                                                                                                                                                                                                                                                                                                                                                                                                                                                                                                                           | 21:3838367 A>G            | P.V136H (V136H)               | Missense                      | 1                                                                           | ETS                             | 0.698                      | NA          | 0.19 (intolerant)                 | No                                         | Disorders of both mitral and aortic valves |
| RCG Million Exome Variant Browser                                                                                                                                                                                                                                                                                                                                                                                                                                                                                                                                                                                    | 21:3838367 A>G            | P.V136H (V136H)               | Missense                      | 1                                                                           | ETS                             | 0.698                      | NA          | 0.19 (intolerant)                 | Unknown                                    | Disorders of both mitral and aortic valves |
| All of Us                                                                                                                                                                                                                                                                                                                                                                                                                                                                                                                                                                                                            | 21:3838383 G>A            | P.A187N (A187V)               | Missense                      | 0                                                                           | ETS                             | 0.696                      | NA          | 0.16 (highly intolerant)          | None reported                              | Disorders of both mitral and aortic valves |
| RCG Million Exome Variant Browser                                                                                                                                                                                                                                                                                                                                                                                                                                                                                                                                                                                    | 21:3838367 A>T            | P.Phe301E (F301E)             | Missense                      | 1                                                                           | ETS                             | 0.821                      | NA          | 0.2 (intolerant)                  | Unknown                                    | Disorders of both mitral and aortic valves |
| UK Biobank                                                                                                                                                                                                                                                                                                                                                                                                                                                                                                                                                                                                           | 21:3838367 A>T            | P.Phe301E (F301E)             | Missense                      | 1                                                                           | ETS                             | 0.821                      | NA          | 0.2 (intolerant)                  | No                                         | Disorders of both mitral and aortic valves |
| UK Biobank                                                                                                                                                                                                                                                                                                                                                                                                                                                                                                                                                                                                           | 21:3838367 C>G            | P.A193I (H193I)               | Missense                      | 0                                                                           | ETS                             | 0.648                      | NA          | 0.25 (intolerant)                 | Unknown                                    | Disorders of both mitral and aortic valves |
| UK Biobank                                                                                                                                                                                                                                                                                                                                                                                                                                                                                                                                                                                                           | 21:3838369 A>G            | P.Phe321L (F321L)             | Missense                      | 1                                                                           | ETS                             | 0.512                      | NA          | 0.24 (intolerant)                 | Unknown                                    | Disorders of both mitral and aortic valves |
| UK Biobank                                                                                                                                                                                                                                                                                                                                                                                                                                                                                                                                                                                                           | 21:3838364 A>T            | P.Ty499A (Y499N)              | Missense                      | 1                                                                           | ETS                             | 0.593                      | NA          | 0.45 (intolerant)                 | None reported                              | Disorders of both mitral and aortic valves |
| UK Biobank                                                                                                                                                                                                                                                                                                                                                                                                                                                                                                                                                                                                           | 21:3838361 T>C            | P.Ty41C (Y41C)                | Missense                      | 0                                                                           | ETS                             | 0.609                      | NA          | 0.46 (intolerant)                 | None reported                              | Disorders of both mitral and aortic valves |

Supplemental Table 3. Rare heterozygous EKG variants associated with aortic valve morphology and/or physiology and/or aortic aneurysm. Patients 6-8, 10-11 have been previously published (1-9,27). Information unknown (Unknown), Porphyria blood (PB), Not applicable (NA), Not performed (NP)

| Patient ID | Family member | c.BICNS (08253318/31)                                                                                                              | ERG_c.BICNS (NSL_182518.4) | ERG_p.BICNS (NP_391168.1 (NSP281115) (879 aa)) | Variant Class       | Variant | NAF (%) | Sex    | Sample analyzed | genom ID (v 4.0.0) | COSMIC (v9)            | CARD Score (See case score)      | REVEL Score (Rank score) | Age onset of phenotype (yr) | Genotype EKG (NAF is relative percent range (40-60%)) | Ch21q cent.GH | Other phenotype/s                                                                                                                                                                                                                                                                |                                                                                                                                                                                                                                                                                                                                                                                                                                                                                                                                                                 |
|------------|---------------|------------------------------------------------------------------------------------------------------------------------------------|----------------------------|------------------------------------------------|---------------------|---------|---------|--------|-----------------|--------------------|------------------------|----------------------------------|--------------------------|-----------------------------|-------------------------------------------------------|---------------|----------------------------------------------------------------------------------------------------------------------------------------------------------------------------------------------------------------------------------------------------------------------------------|-----------------------------------------------------------------------------------------------------------------------------------------------------------------------------------------------------------------------------------------------------------------------------------------------------------------------------------------------------------------------------------------------------------------------------------------------------------------------------------------------------------------------------------------------------------------|
| 1          | 1             | Maximum dilation (dilat) 17.96x14x 18.62x16.96/9x ERG_KCNJ15<br>Maximum dilation (dilat) 17.91x14x 18.44x15.91/9x ERG_KCNJ15_KCN16 | NA                         | NA                                             | Whole gene deletion |         |         | Male   | Blood           | NA                 | NA                     | NA                               | NA                       | <18                         | Internally inherited                                  | No            | Aortic and mitral valve stenosis<br>Mild to moderate aortic regurgitant valve insufficiency                                                                                                                                                                                      |                                                                                                                                                                                                                                                                                                                                                                                                                                                                                                                                                                 |
| 2          | 1             | 21.38445576G>T                                                                                                                     | c.49C>A                    | P_1x21Ea (V272)                                | Termination         |         |         | 40-60  | Male            | PB                 | 1                      | 1                                | 38 (0.976)               | NA                          | Yes                                                   | No            | Disorders of both mitral and aortic valves, low platelet count (13%), low neutrophil count (13%)                                                                                                                                                                                 |                                                                                                                                                                                                                                                                                                                                                                                                                                                                                                                                                                 |
| 3          | 1             | 21.38424346G>A                                                                                                                     | c.320C>T                   | P_1x128Ea (P128)                               | Missense            |         |         | 40-60  | Male            | PB                 | 2                      | 2                                | 23.9 (0.83)              | 0.398 (0.84)                | Yes                                                   | No            | Abdominal aortic aneurysm, low platelet count                                                                                                                                                                                                                                    |                                                                                                                                                                                                                                                                                                                                                                                                                                                                                                                                                                 |
| 4          | 1             | 21.38423358G>C                                                                                                                     | c.138G>29C>G               | Inframe                                        | Splice Donor gene   |         |         | Male   |                 | 0                  | 0                      | NA                               | NA                       |                             | Unknown (WES conducted on exome)                      | No            | Bicuspid aortic valve<br>congenital cleft digestive, congenital genital, congenital musculoskeletal, ASD Primary Congenital heart disease: perimembranous ventricular septal defect. Secondary Congenital heart disease: Secundum atrial septal defect, Patent Ductus Arteriosus |                                                                                                                                                                                                                                                                                                                                                                                                                                                                                                                                                                 |
| 5          | 1             | 21.3840364C>T                                                                                                                      | c.436A>A                   | S_1x145* (S145*)                               | Termination         |         |         | 22     | amniocytes      | 0                  | 2 (Malignant melanoma) | 40 (0.963)                       | NA                       | NA                          | de novo                                               | No            | Ascending aorta dilation<br>diagnosed in situ with non-stenotic hydrate femals, cyclic hyponatremia, congenital heart defect: membranous ventricular septal defect                                                                                                               |                                                                                                                                                                                                                                                                                                                                                                                                                                                                                                                                                                 |
| 6          | 1             | 21.38403558del                                                                                                                     | c.541del                   | P_1x618A146*22 (S182A4*22)                     | Frameshift          |         |         | 4      | Male            | 1                  | 0 (1x S1826*26)        | NA                               | NA                       | Unknown                     | Unknown                                               | Yes           | Lymphoedema. Aortic regurgitation.                                                                                                                                                                                                                                               |                                                                                                                                                                                                                                                                                                                                                                                                                                                                                                                                                                 |
| 7          | 2             | 21.38403558del                                                                                                                     | c.541del                   | P_1x618A146*22 (S182A4*22)                     | Frameshift          |         |         | Female |                 | 1                  | 0 (1x S1826*26)        | NA                               | NA                       | Unknown                     | inherited                                             | No            | Lymphoedema<br>Hypertension. Transient ischemic attack                                                                                                                                                                                                                           |                                                                                                                                                                                                                                                                                                                                                                                                                                                                                                                                                                 |
| 8          | 1             | 21.38402955A>T                                                                                                                     | c.633T>A                   | P_1x212* (L212*)                               | Termination         |         |         | Male   | PB              | 0                  | 0                      | 39 (0.94)                        | NA                       | 40                          | Unknown                                               | NP            | No                                                                                                                                                                                                                                                                               | Aortic Aneurysm. Hemorrhagic stroke, abnormal placid function, abnormal placid aggregation. Mild to severe aortic valve calcification and stenosis, mild mitral valve insufficiency.<br>ASPS-Heredit and ADP-Heredit pathologic, Antihypertensive syndrome, hypercholesterolemia, thrombosis of left V femoralis (07/2007), retinal vein occlusions of both eyes (2007), Multiple aortic aneurysms (aorta, and multiple vessels of large caliber including an intracranial aneurysm), Aortic hypertension. Coronary heart disease without major artery stenosis |
| 9          | 1             | 21.3838738C>G                                                                                                                      | c.1189G>C                  | P_1x317Bp (B317P)                              | Missense            |         |         | 44     | Male            | PB                 | 0                      | 0 (1x R179C, 1x R179C, 2x R179L) | 31 (0.854)               | 0.888 (0.968)               | 29                                                    | Yes           | No                                                                                                                                                                                                                                                                               | Severe aortic valve insufficiency<br>Myofibrillar myopathy, systolic hypertension (arhythmogenic fibromyxomatous and leukodystrophy)<br>an inguinal hernia on both sides, deformation (anterior recess) of the femoral head, Cranius hernia, Bilateral vascular recess of the femoral head,                                                                                                                                                                                                                                                                     |
| 10         | 1             | 21.3838667C>C                                                                                                                      | c.1157A>G                  | P_1x186Cp (T186)                               | Missense            |         |         | 40-60  |                 | PB                 | 0                      | 0                                | 30 (0.88)                | 0.733 (0.908)               | Inherited                                             | No            | Disorders of both Mitral and tricuspid Valve<br>Lymphoedema. Aortic regurgitation<br>Ascending tubular aorta aneurysm.                                                                                                                                                           |                                                                                                                                                                                                                                                                                                                                                                                                                                                                                                                                                                 |
| 11         | 1             | 21.38384558del                                                                                                                     | c.1188del                  | P_A6683T184*42 (N663T184*42)                   | Frameshift          |         |         | Female |                 | 0                  | 0                      | NA                               | NA                       | NA                          | Inherited                                             | No            | Hypertension. Cerebral ischemia. Cerebral ischemia. Carotid artery dilation                                                                                                                                                                                                      |                                                                                                                                                                                                                                                                                                                                                                                                                                                                                                                                                                 |
| 12         | 2             | 21.38384558del                                                                                                                     | c.1188del                  | P_A6683T184*42 (N663T184*42)                   | Frameshift          |         |         | Male   |                 | 0                  | 0                      | NA                               | NA                       | NA                          | Inherited                                             | No            | Lymphoedema. Aortic regurgitation<br>Tricuspid regurgitation.                                                                                                                                                                                                                    |                                                                                                                                                                                                                                                                                                                                                                                                                                                                                                                                                                 |

Supplemental Table 4: Expanding the known variants associated with ERG deficiency syndrome. Information unknown (blank)

| Patient ID | Source                           | g.HGVs (GRCh38hg38) (Chr21) | ERG c.HGVs (NM_182918.4) | ERG p.HGVs (NP_891548.1) (ENSPP28319.7) (479 aa) | Variant Class | VAf (%) | Sex  | Sample analysed | gnomAD (v4.0.0) | COSMIC (v99) | CADD Score (Raw rank score) | REVEL Score (Rank score) | ERG deficiency syndrome Phenotype | Age of onset of phenotypes (yr) | Germline ERG (inherited/de novo) (VAf = 40-60%) | Chr21q onLOH     | Somatic mutations    | Other phenotypes                                                                                                                                                                                                                                                                                                                                                                                                                                                                                                                                                                                                                                                                                                                                                                                                                                                                                                                                                                                                                                                                                                                                                                                                                                                                                                                                                                                                                                                                                                                                                                                                                                                                                                                                                                                                                                                                                                                                                                                                                                                                                                                                                                                                                                                                                                                                                                                                                                                                                                                                                                                                                                                                                                                                                                                                                                                                                                                                                                                                           |
|------------|----------------------------------|-----------------------------|--------------------------|--------------------------------------------------|---------------|---------|------|-----------------|-----------------|--------------|-----------------------------|--------------------------|-----------------------------------|---------------------------------|-------------------------------------------------|------------------|----------------------|----------------------------------------------------------------------------------------------------------------------------------------------------------------------------------------------------------------------------------------------------------------------------------------------------------------------------------------------------------------------------------------------------------------------------------------------------------------------------------------------------------------------------------------------------------------------------------------------------------------------------------------------------------------------------------------------------------------------------------------------------------------------------------------------------------------------------------------------------------------------------------------------------------------------------------------------------------------------------------------------------------------------------------------------------------------------------------------------------------------------------------------------------------------------------------------------------------------------------------------------------------------------------------------------------------------------------------------------------------------------------------------------------------------------------------------------------------------------------------------------------------------------------------------------------------------------------------------------------------------------------------------------------------------------------------------------------------------------------------------------------------------------------------------------------------------------------------------------------------------------------------------------------------------------------------------------------------------------------------------------------------------------------------------------------------------------------------------------------------------------------------------------------------------------------------------------------------------------------------------------------------------------------------------------------------------------------------------------------------------------------------------------------------------------------------------------------------------------------------------------------------------------------------------------------------------------------------------------------------------------------------------------------------------------------------------------------------------------------------------------------------------------------------------------------------------------------------------------------------------------------------------------------------------------------------------------------------------------------------------------------------------------------|
| A          | Population database (UK Biobank) | 21:38383908 T>A             | c.935A>T                 | p.Gh312L.eu (Q312L)                              | Missense      | 40.60   |      | Blood           | 1               | 0            | 29.7 (0.878)                | 0.73 (0.905)             | Localized edema                   |                                 | inherited                                       |                  |                      | A09.9 Gastroenteritis and colitis of unspecified origin, A41.9 Septicemia, unspecified, B95.1 Streptococcus, group B, as the cause of diseases classified to other chapters, B95.6 Staphylococcus aureus as the cause of diseases classified to other chapters, B96.2 Escherichia coli [E. coli] as the cause of diseases classified to other chapters, C90.0 Multiple myeloma, D18.0 Haemangioma, any site, D70 Agnathocystosis, E83.5 Disorders of calcium metabolism, E87.6 Hypokalaemia, F41.9 Anxiety disorder, unspecified, I26.9 Pulmonary embolism without mention of acute cor pulmonale, I27.2 Other secondary pulmonary hypertension, I51.7 Cardiomegaly, I84.5 External haemorrhoids without complication, J10.0 Influenza with pneumonia, influenza virus identified, J10.1 Influenza with other respiratory manifestations, influenza virus identified, J12.1 Respiratory syncytial virus pneumonia, J18.0 Bronchopneumonia, unspecified, J18.1 Lobar pneumonia, unspecified, J22 Unspecified acute lower respiratory infection, J45.9 Asthma, unspecified, J69 Respiratory failure, unspecified, J69.9 Respiratory failure unspecified, Type II [hypercapnic], K20 Oesophagitis, K44.9 Diaphragmatic hernia without obstruction or gangrene, K59.0 Constipation, K63.0 Cholelithiasis, M19.9 Arthritis, unspecified, M48.54 Collapsed vertebra, not elsewhere classified (Thoracic region), M94.0 Chondrocostal junction syndrome [Tietze], N39.0 Urinary tract infection, site not specified, R06.0 Dyspnoea, R09.2 Respiratory arrest, R10.1 Pain localised to upper abdomen, R10.3 Pain localised to other parts of lower abdomen, R11 Nausea and vomiting, R50.9 Fever, unspecified, R60.0 Localised oedema, Z02.8 Other examinations for administrative purposes, Z51.1 Chemotherapy session for neoplasm, Z51.2 Other chemotherapy, Z53.8 Procedure not carried out for other reasons, Z73.9 Problem related to life management difficulty, unspecified, Z86.0 Personal history of other neoplasms, Z86.4 Personal history of psychoactive substance abuse, Z86.7 Personal history of diseases of the circulatory system, Z92.1 Personal history of long term (current) use of anticoagulants, Z92.6 Personal history of chemotherapy for neoplastic disease, Z99.8 Dependence on other enabling machines and devices                                                                                                                                                                                                                                                                                                                                                                                                                                                                                                                                                                                                                                                                                 |
| B          | International collaboration      | 21:38383756C>T              | c.1087G>A                | p.Asp363Am (D363N)                               | Missense      | 42      | Male |                 | 0               | 5            | 33 (0.799)                  | 0.41 (0.722)             | Pancytopenia                      | 6                               | inherited                                       | UPD21q confirmed | SETBP1, ANXA1, CSF3R | hypocellular bone marrow (without fibrosis), macrocytosis. Progression to hypercellular bone marrow with significantly increased dysplastic megakaryopoiesis and marrow fibrosis (Monosomy 7), (Received HSCT). Echocardiogram in the 1st year of life: small muscular ventricular septal defect (VSD) without relevant shunt. Echocardiogram at age 13: unremarkable, and no abnormal cardiac findings                                                                                                                                                                                                                                                                                                                                                                                                                                                                                                                                                                                                                                                                                                                                                                                                                                                                                                                                                                                                                                                                                                                                                                                                                                                                                                                                                                                                                                                                                                                                                                                                                                                                                                                                                                                                                                                                                                                                                                                                                                                                                                                                                                                                                                                                                                                                                                                                                                                                                                                                                                                                                    |
| C          | Population database (UK Biobank) | 21:38383693 T>C             | c.1150A>G                | p.Lys384Glu (K384E)                              | Missense      | 2       |      | Blood           | 2               | 0            | 28.6 (0.842)                | 0.687 (0.886)            | Thrombocytopenia, Localised edema |                                 | inherited                                       |                  |                      | A09.9 Gastroenteritis and colitis of unspecified origin, C17.0 Duodenum, C18.7 Sigmoid colon, D12.3 Transverse colon, D12.5 Sigmoid colon, D37.4 Colon, D50.9 Iron deficiency anaemia, unspecified, D69.6 Thrombocytopenia, unspecified, E11.9 Without complications, E87.6 Hypokalaemia, H35.0 Background retinopathy and retinal vascular changes, H53.8 Other visual disturbances, H81.1 Benign paroxysmal vertigo, H90.3 Sensorineural hearing loss, bilateral, H91.9 Hearing loss, unspecified, I03.1 Mitralis, I10 Essential (primary) hypertension, I48.1 Persistent atrial fibrillation, I48.9 Atrial fibrillation and atrial flutter, unspecified, I50.0 Congestive heart failure, I50.9 Heart failure, unspecified, I51.7 Cardiomegaly, I67.9 Cerebrovascular disease, unspecified, I70.9 Generalised and unspecified atherosclerosis, I84.2 Internal haemorrhoids without complication, I84.9 Unspecified haemorrhoids without complication, I86.8 Varicose veins of other specified sites, P66.90 Respiratory failure, unspecified, Type I [hypoxic], K21.9 Gastroesophageal reflux disease without oesophagitis, K22.2 Dyspepsia, K30 Dyspepsia, K44.9 Diaphragmatic hernia without obstruction or gangrene, K58.9 Irritable bowel syndrome without diarrhoea, K63.8 Other specified diseases of intestine, K76.0 Fatty (change of) liver, not elsewhere classified, K80.2 Calculus of gallbladder without cholecystitis, K85.1 Biliary acute pancreatitis, M10.9 Gout, unspecified, M13.9 Arthritis, unspecified, M17.9 Spondylosis, unspecified, M79.86 Other specified soft tissue disorders (lower leg), N17.9 Acute renal failure, unspecified, N18.1 Chronic kidney disease, stage 1, N18.3 Chronic kidney disease, stage 3, N39.0 Urinary tract infection, site not specified, N40 Hypertrophy of prostate, N48.5 Ulcer of penis, R10.1 Pain localised to upper abdomen, R11 Nausea and vomiting, R18 Ascites, R55 Syncope and collapse, R60.0 Localised oedema, R63.4 Abnormal findings on diagnostic imaging of other parts of digestive tract, R94.5 Abnormal results of liver function studies, Y83.2 Surgical operation with anastomosis, bypass or graft, Y83.6 Removal of other organ (partial) total, Z03.8 Observation for other suspected diseases and conditions, Z09.0 Follow up examination after surgery for other conditions, Z12.1 Special screening examination for neoplasm of intestinal tract, Z50.1 Other physical therapy, Z53.0 Procedure not carried out because of contraindication, Z72.1 Alcohol use, Z85.0 Personal history of malignant neoplasm of digestive organ, Z86.4 Personal history of psychoactive substance abuse, Z86.6 Personal history of diseases of the nervous system and sense organs, Z87.1 Personal history of diseases of the digestive system, Z90.4 Acquired absence of other parts of digestive tract, Z92.1 Personal history of long term (current) use of anticoagulants, Z92.2 Personal history of long term (current) use of other medications |
| D          | International collaboration      | 21:38383504A>C              | c.1338del                | p.Phe446L.eu#49 (F446L#49)                       | Frameshift    | 36      | Male | Blood           | 0               | 6            | NA                          | NA                       | Slow blood clotting (50 sec aPTT) |                                 | de novo                                         |                  |                      | Right and leg-emphasized spastic movement disorder with progressive course, neurogenic hollow foot, hypotonia and strength deficit (DD: infantile spastic cerebral paresis)                                                                                                                                                                                                                                                                                                                                                                                                                                                                                                                                                                                                                                                                                                                                                                                                                                                                                                                                                                                                                                                                                                                                                                                                                                                                                                                                                                                                                                                                                                                                                                                                                                                                                                                                                                                                                                                                                                                                                                                                                                                                                                                                                                                                                                                                                                                                                                                                                                                                                                                                                                                                                                                                                                                                                                                                                                                |

Supplemental Table 5: Rare ERG heterozygous variants found in patients with cnLOH across the ERG locus.

| Source                           | Family member | g.HGVs (GRCh38/hg38) (Chr21) | ERG c.HGVs (NM_182918.4) | ERG p.HGVs (NP_891548.1) (ENSP288319.7) (479 aa) | Variant Class | VAF (%) | Sex    | Sample analysed | gnomAD (v 4.0.0) | COSMIC (v99) | CADD Score (Raw rank score) | REVEL Score (Rank score) | Ages onset of phenotypes (yr) | Germline ERG (inherited/ de novo) | Chr21q cnLOH | ERG deficiency syndromic Phenotype | Other phenotype/s                                                                                                                                                                                                                                                                                                                                                                                                                                                                                                                                                                                                                                                                                                                                                                                                                                                                                                                                                                                                                                                                                                                                                                                                                                                                                                                                                                                                                                                                                                                                                                                                                                                                                                                                                                                                                                                                                                                                                                                                                                                                                                                                                                                                              |
|----------------------------------|---------------|------------------------------|--------------------------|--------------------------------------------------|---------------|---------|--------|-----------------|------------------|--------------|-----------------------------|--------------------------|-------------------------------|-----------------------------------|--------------|------------------------------------|--------------------------------------------------------------------------------------------------------------------------------------------------------------------------------------------------------------------------------------------------------------------------------------------------------------------------------------------------------------------------------------------------------------------------------------------------------------------------------------------------------------------------------------------------------------------------------------------------------------------------------------------------------------------------------------------------------------------------------------------------------------------------------------------------------------------------------------------------------------------------------------------------------------------------------------------------------------------------------------------------------------------------------------------------------------------------------------------------------------------------------------------------------------------------------------------------------------------------------------------------------------------------------------------------------------------------------------------------------------------------------------------------------------------------------------------------------------------------------------------------------------------------------------------------------------------------------------------------------------------------------------------------------------------------------------------------------------------------------------------------------------------------------------------------------------------------------------------------------------------------------------------------------------------------------------------------------------------------------------------------------------------------------------------------------------------------------------------------------------------------------------------------------------------------------------------------------------------------------|
| Population database (UK Biobank) | 1             | 21:38383897A>G               | c.946T>C                 | p.Phe316Leu (F316L)                              | Missense      | 25      | Female | Blood           | 1                | 0            | 29.7 (0.87)                 | 0.853 (0.955)            |                               | likely inherited                  | Yes          | None reported                      | C44.7 Skin of lower limb, including hip, C50.9 Breast, unspecified, D22.3 Melanocytic naevi of other and unspecified parts of face, E78.0 Pure hypercholesterolaemia, F32.9 Depressive episode, unspecified, F41.9 Anxiety disorder, unspecified, I11.4 Other conjunctival vascular disorders and cysts, I21.8 Other specified disorders of iris and ciliary body, H25.8 Other senile cataract, I10 Essential (primary) hypertension, I83.9 Varicose veins of lower extremities without ulcer or inflammation, I97.8 Other postprocedural disorders of circulatory system, not elsewhere classified, J34.8 Other specified disorders of nose and nasal sinuses, J44.9 Chronic obstructive pulmonary disease, unspecified, K21.0 Gastro-oesophageal reflux disease with oesophagitis, K21.9 Gastro-oesophageal reflux disease without oesophagitis, K31.7 Polyp of stomach and duodenum, K40.9 Unilateral or unspecified inguinal hernia, without obstruction or gangrene, K44.9 Diaphragmatic hernia without obstruction or gangrene, L90.5 Scar conditions and fibrosis of skin, L98.9 Disorder of skin and subcutaneous tissue, unspecified, M13.9 Arthritis, unspecified, M21.24 Flexion deformity (Hand), M24.54 Contracture of joint (Hand), M79.86 Other specified soft tissue disorders (Lower leg), R06.0 Dyspnoea, S01.2 Open wound of nose, S02.20 Fracture of nasal bones (closed), S09.9 Unspecified injury of head, S61.0 Open wound of finger(s) without damage to nail, S63.1 Dislocation finger, T92.3 Sequelae of dislocation, sprain and strain of upper limb, W01.9 Unspecified place, W10.5 Trade and service area, Y48.3 Local anaesthetics, Y86 Sequelae of other accidents, Z09.8 Follow-up examination after other treatment, for other conditions, Z85.0 Personal history of malignant neoplasm of digestive organs, Z85.3 Personal history of malignant neoplasm of breast, Z85.8 Personal history of malignant neoplasms of other organs and systems, Z87.1 Personal history of diseases of the digestive system, Z88.5 Personal history of allergy to narcotic agent, Z88.6 Personal history of allergy to analgesic agent, Z92.2 Personal history of long-term (current) use of other medicaments |
| Population database (UK Biobank) | 1             | 21:38383789C>T               | c.1054G>A                | p.Gly352Arg (G352R)                              | Missense      | 19      | Female | Blood           | 0                | 1            | 32 (0.82)                   | 0.939 (0.987)            |                               | likely inherited                  | Yes          | Hypertension                       | B95.6 Staphylococcus aureus as the cause of diseases classified to other chapters, C50.9 Breast, unspecified, C77.3 Axillary and upper limb lymph nodes, D12.2 Ascending colon, D12.3 Transverse colon, E66.9 Obesity, unspecified, H90.3 Sensorineural hearing loss, bilateral, I10 Essential (primary) hypertension, K57.3 Diverticular disease of large intestine without perforation or abscess, K63.5 Polyp of colon, L03.3 Cellulitis of trunk, M19.91 Arthrosis, unspecified (Shoulder region), M75.4 Impingement syndrome of shoulder, R00.2 Palpitations, R19.5 Other fecal abnormalities, T85.7 Infection and inflammatory reaction due to other internal prosthetic devices, implants and grafts, Z85.3 Personal history of malignant neoplasm of breast, Z88.0 Personal history of allergy to other drugs, medicaments and biological substances, Z90.1 Acquired absence of breast(s)                                                                                                                                                                                                                                                                                                                                                                                                                                                                                                                                                                                                                                                                                                                                                                                                                                                                                                                                                                                                                                                                                                                                                                                                                                                                                                                              |

**Supplemental Table 6: ERG-specific ACMG-AMP guidelines developed for variant classification.** The framework incorporates pathogenic variant-defining features (e.g., SGR [PM3]), curated phenotypic evidence, and expert consensus on the weighting of functional and computational data.

| Criteria                               | When to apply                                                                                                     | Up/downgrade   | Why                                                                                                                                                                                                                                                                                           | Other notes                                                                                                                                                                                                                                                                                                              |
|----------------------------------------|-------------------------------------------------------------------------------------------------------------------|----------------|-----------------------------------------------------------------------------------------------------------------------------------------------------------------------------------------------------------------------------------------------------------------------------------------------|--------------------------------------------------------------------------------------------------------------------------------------------------------------------------------------------------------------------------------------------------------------------------------------------------------------------------|
| Terminations (PVS1)                    | Terminations removing DNA binding domain                                                                          | PVS1           | Literature and functional studies suggest this is the most important domain to do ERGs TF role.                                                                                                                                                                                               | To apply this we are assuming clinical validity classification of gene is STRONG or DEFINITIVE. ClinGene curation panel in Dec/Jan                                                                                                                                                                                       |
|                                        | If termination is after 400 aa                                                                                    | PVS1_Moderate  | Although the termination does not remove the DNA binding domain, functional studies suggest a functional consequence for N-terminal terminations                                                                                                                                              |                                                                                                                                                                                                                                                                                                                          |
|                                        | If termination is before 68 aa                                                                                    | PVS1_Moderate  | Re-initiation sites at position 33 and 68. Although just cDNA constructs, we have shown these do re-initiate here.                                                                                                                                                                            |                                                                                                                                                                                                                                                                                                                          |
| De novo (PS2)                          | Proven de novo                                                                                                    | PS2            | Variants identified as de novo in patients with ERG deficiency syndrome, confirmed by parental testing, provide strong evidence of pathogenicity.                                                                                                                                             |                                                                                                                                                                                                                                                                                                                          |
| Functional data (PS3)                  | Complete LOF in any functional assay (transactivation, DNA binding and subcellular localisation)                  | PS3            | Complete LOF in any assay indicates loss of ERG's ability to act as a transcription factor.                                                                                                                                                                                                   |                                                                                                                                                                                                                                                                                                                          |
|                                        | Partial loss (~50% loss in transactivation assay)                                                                 | PS3            | A reduction of ~50% in transactivation activity has been called to represent the functional threshold that results in pathogenicity                                                                                                                                                           |                                                                                                                                                                                                                                                                                                                          |
|                                        | Significant changes in any functional assay                                                                       | PS3_Supporting | Significant alterations in any functional assay demonstrates impaired ERG function and supports pathogenicity                                                                                                                                                                                 |                                                                                                                                                                                                                                                                                                                          |
|                                        | LOF in one assay WT like in another                                                                               | PS3_Moderate   | LOF in one assay, (even if WT activity is retained in another) still supports pathogenicity, as disruption of a single critical ERG function (e.g., DNA binding or transactivation) is sufficient to impair its role as a transcription factor.                                               |                                                                                                                                                                                                                                                                                                                          |
| Hot spot (PM1)                         | Between amino acids 340-365                                                                                       | PM1_Supporting | Variants clustered between amino acids 340-365 occur within a mutational hot spot critical for ERG function and often result in partial LOF shown by functional assays. Variants 365 - 370 (although no functional data has been accumulated so far, would predict to also be PM1_Supporting) |                                                                                                                                                                                                                                                                                                                          |
|                                        | Between amino acids 370-375                                                                                       | PM1            | Variants clustered between amino acids 370-375 occur within a mutational hot spot critical for ERG function, often resulting in complete LOF in functional assays                                                                                                                             |                                                                                                                                                                                                                                                                                                                          |
|                                        | Between amino acids 380-390                                                                                       | PM1_Supporting | Variants clustered between amino acids 380-390 occur within a mutational hot spot critical for ERG function and often result in partial LOF shown by functional assays. Variants 375 - 380 (although no functional data has been accumulated so far, would predict to also be PM1_Supporting) |                                                                                                                                                                                                                                                                                                                          |
| Absence in general population (PM2)    | LOF variants (i.e. premature termination stops and frameshifts, and splice site variants) seen <5 times in gnomAD | PM2            | LOF variants are markedly rarer in the general population compared with missense variants, and no variant observed more than five times has been associated with pathogenicity or functional impact.                                                                                          |                                                                                                                                                                                                                                                                                                                          |
|                                        | Missense variants seen < 5 times in gnomAD                                                                        | PM2_Supporting | No missense variant observed more than five times has been associated with pathogenicity or functional impact.                                                                                                                                                                                |                                                                                                                                                                                                                                                                                                                          |
| Surrogate for SGR (PM3)                | cnLOH across 21q present through SNP array/B-allele frequency plot                                                | PM3            | To date, SGR has only been present in patients harboring LP/P ERG variants and therefore we are calling this an indicator of pathogenicity                                                                                                                                                    |                                                                                                                                                                                                                                                                                                                          |
| Seen before at same residue (PM5)      | variant affecting the same amino acid residue as a previously established pathogenic or likely pathogenic         | PM5            | A novel variant affecting the same amino acid residue as a previously established pathogenic or likely pathogenic variant provides moderate evidence for pathogenicity.                                                                                                                       |                                                                                                                                                                                                                                                                                                                          |
| Multiple affected family members (PP1) | The variant is observed in multiple affected family members.                                                      | PP1            | Co-segregation of the variant with disease in multiple affected family members provides supporting evidence for pathogenicity.                                                                                                                                                                |                                                                                                                                                                                                                                                                                                                          |
| Computational evidence (PP3)           | REVEL > 0.8 (CADD ~ 30)                                                                                           | PP3_Strong     | All such variants to date have been pathogenic and demonstrated functional consequences.                                                                                                                                                                                                      | Based on observations to date, REVEL scores are weighted more heavily than CADD. Computational predictions should be considered alongside functional data to avoid false positives. For example, variants with high REVEL/CADD scores but no demonstrable functional consequence should not be overcalled as pathogenic. |
|                                        | REVEL > 0.6 (CADD ~25)                                                                                            | PP3_Moderate   | Most variants to date have been LP/P and demonstrated functional consequences                                                                                                                                                                                                                 |                                                                                                                                                                                                                                                                                                                          |
|                                        | REVEL > 0.3 (CADD ~20)                                                                                            | PP3_Supporting | Some variants to date have been LP/P and demonstrated functional consequences                                                                                                                                                                                                                 |                                                                                                                                                                                                                                                                                                                          |
