# Supplementary material
Source: Research Square preprint supplement (doi:10.21203/rs.3.rs-9719377/v1)

**Graphical abstract**

**
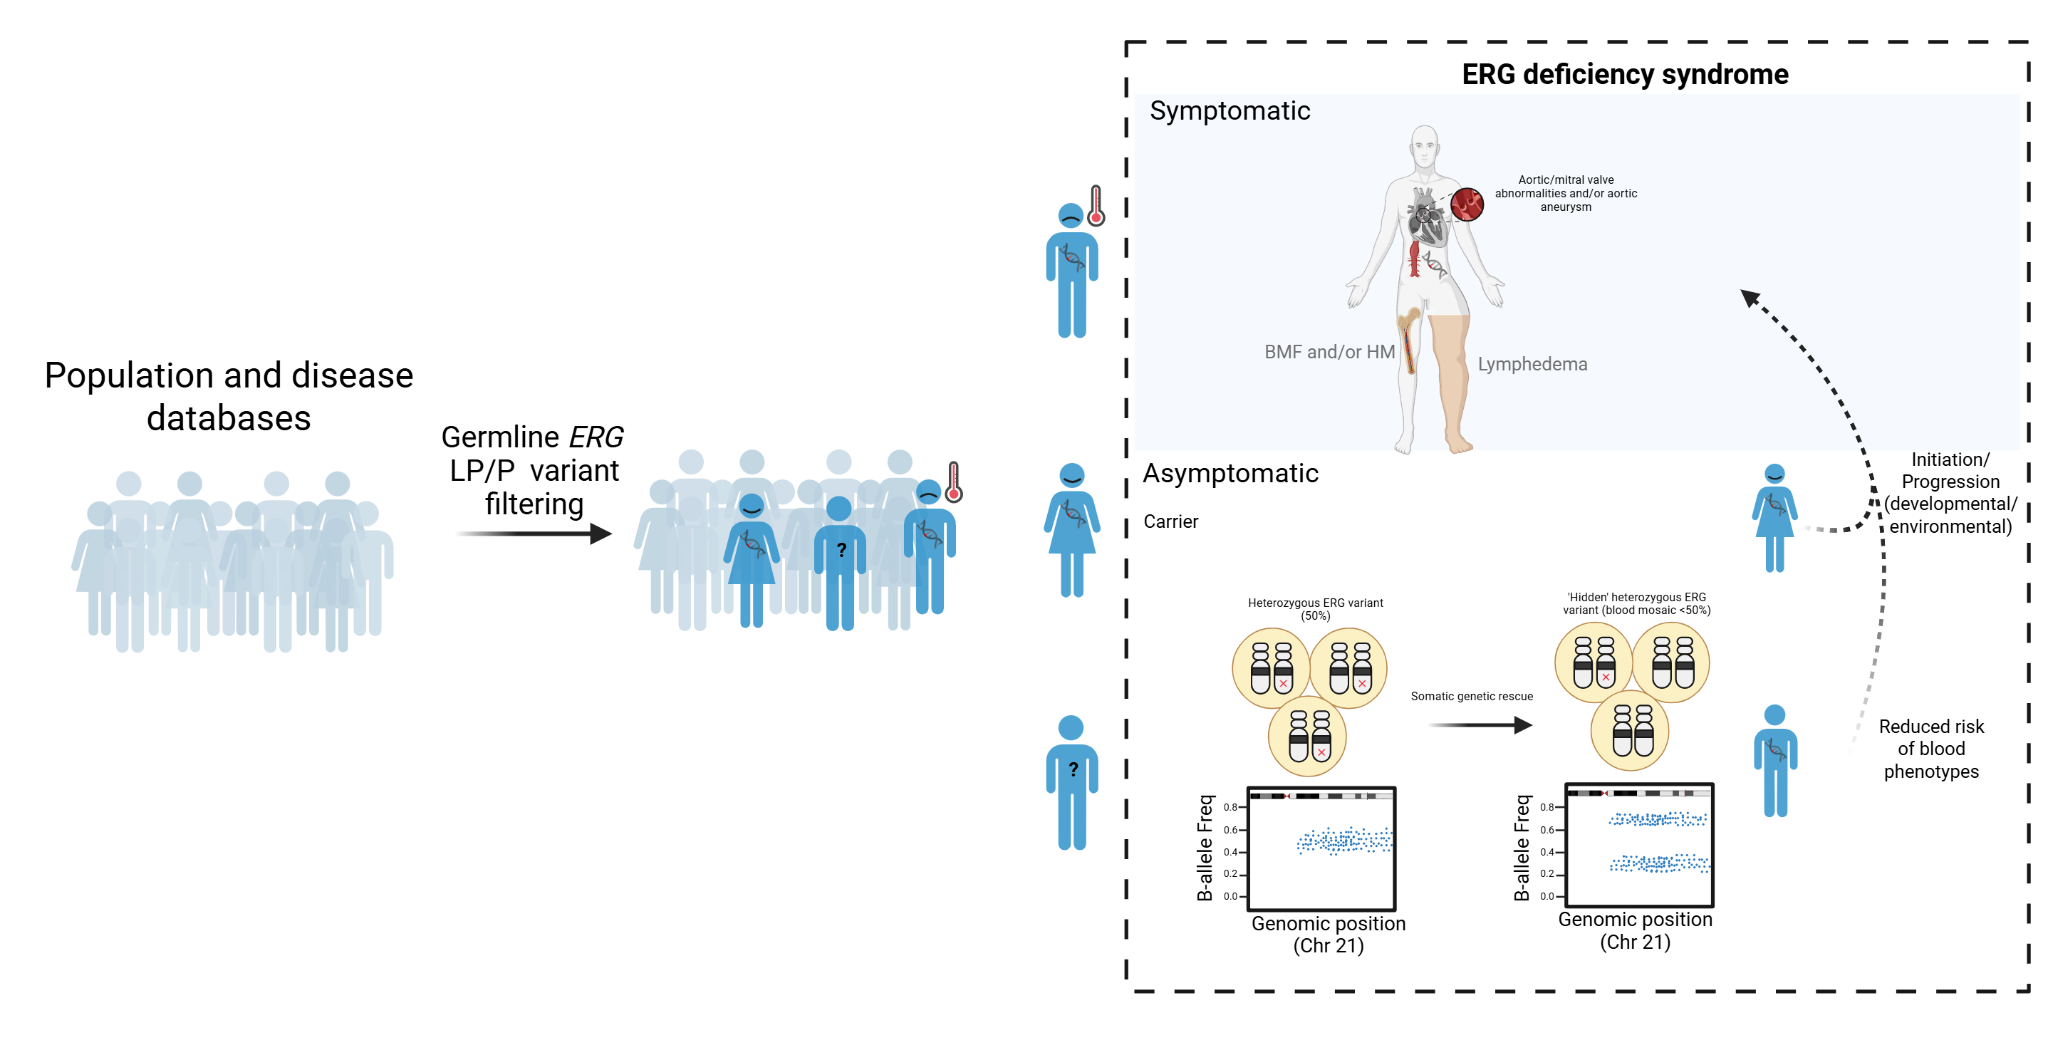
**

Supplement: Supplementary file 1 [file 270c014d0d4dba4aa9ccc391.docx]
